# Supplementary material for: A Salt-Signaling Network Involving Ethylene, Extracellular ATP, Hydrogen Peroxide, and Calcium Mediates K+/Na+ Homeostasis in Arabidopsis
Source: MDPI journal article supplement (doi:10.3390/ijms21228683), 2020-11-17
Supplement: s1 [file s1]

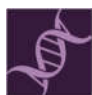

**Table S1.** Primers of a subset of salt-responsive genes for quantitative real-time PCR.

| Gene           | Primer Sets | Sequence (5' to 3')     |
|----------------|-------------|-------------------------|
| <i>AtACT2</i>  | Forward     | GGTAACATTGTGCTCAGTGGTGG |
|                | Reverse     | AACGACCTTAATCTTCATGCTGC |
| <i>AtAHA1</i>  | Forward     | GACAGGATTGTGATATTTGGCC  |
|                | Reverse     | CGGAGGTCGATTATCACCATT   |
| <i>AtSOS1</i>  | Forward     | ATTTTGATGCAGTCAGTGGATG  |
|                | Reverse     | GCAAGCAGATTCTAGTCTTTCG  |
| <i>AtSOS2</i>  | Forward     | GCGAACTCAATGGGTTTAAAGT  |
|                | Reverse     | CTTACGTCTACCATGAAAAGCG  |
| <i>AtSOS3</i>  | Forward     | CCGGTCCATGAAAAAGTCAAAT  |
|                | Reverse     | CTCTTCAATTCTTCTCGCTCG   |
| <i>AtRbohF</i> | Forward     | TATTGGAGACCATCTTGCTTGT  |
|                | Reverse     | CGTAAAAACCGGTTAGTCGATC  |
| <i>AtETR1</i>  | Forward     | TTCCCCGACATTCAAATTTAC   |
|                | Reverse     | GTGGATTTGTCAGTGTTACCAC  |
| <i>AtEIN3</i>  | Forward     | CTGCAGATCACAACAACCTTGA  |
|                | Reverse     | CATCCATCGTTCCTACTACTCC  |
| <i>AtEIL1</i>  | Forward     | TTGAAGAAAGCTTGGAAGTCG   |
|                | Reverse     | TTGATTGCCTCACAAGCTTAC   |
| <i>AtMAPK3</i> | Forward     | TGACAGAATGTTGACGTTTGAC  |
|                | Reverse     | GATTGAGTGCTATGGCTTCTTG  |
| <i>AtMAPK6</i> | Forward     | AGAATATTCCGGCGACTCTTAG  |
|                | Reverse     | ATTCATAGCCGAACAAACGATG  |

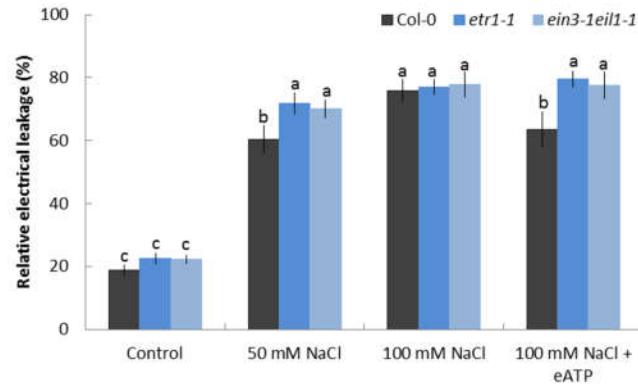

**Figure S1.** Down-regulation of extracellular ATP results in alterations of relative electrolyte leakage upon Col-0, *etr1-1*, and *ein3-1eil1-1* plants in the presence or absence of salinity. Seeds were sown on 1/2 MS medium, after germination, plants were transferred to media subjected to 50 or 100 mM NaCl in the presence or absence of ATP-Na<sub>2</sub> (300  $\mu$ M), and plants were cultured in 1/2 MS NaCl-free (0 mM NaCl) medium as control. The relative electrolyte leakage was tested after a 10 day development. Each column ( $\pm$  SD) represents the mean of five to six individual plants and letters such as a, b, and c denote a significant difference between different treatments,  $p < 0.05$ ).

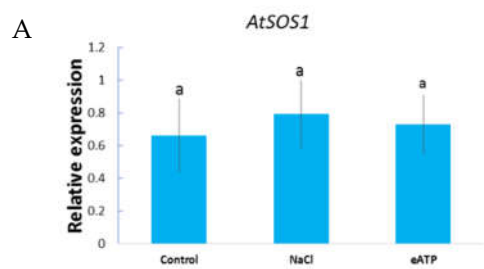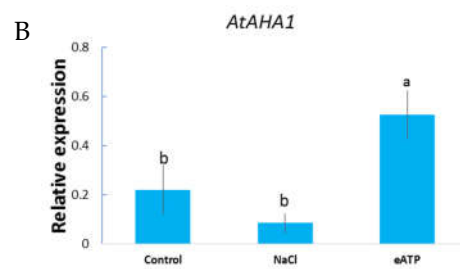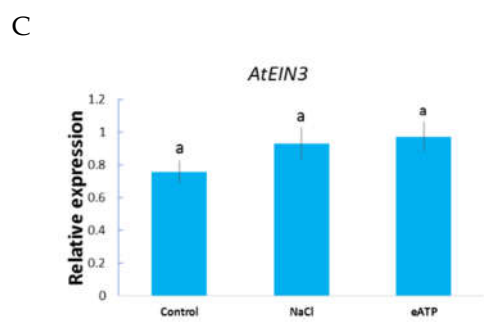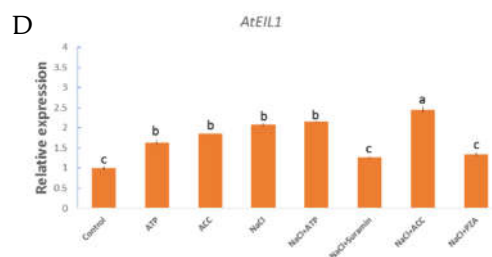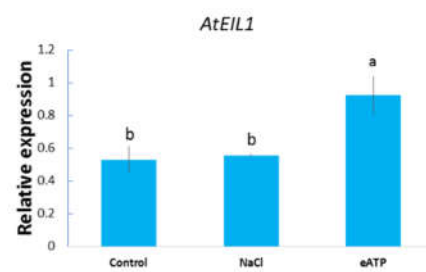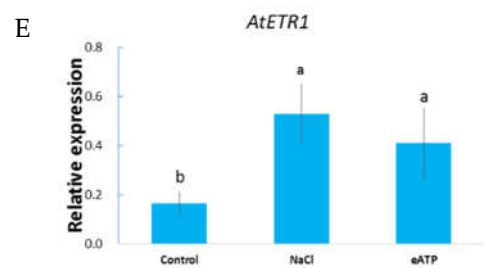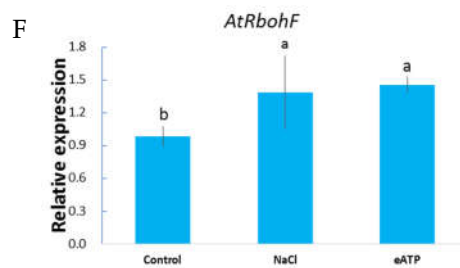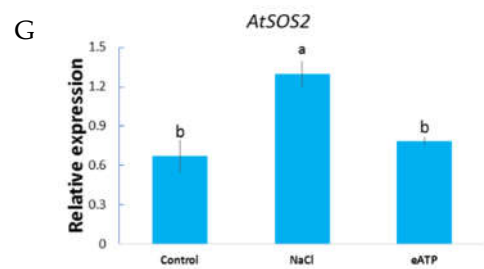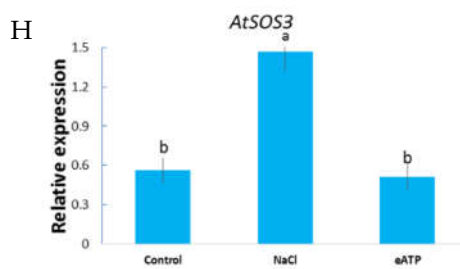

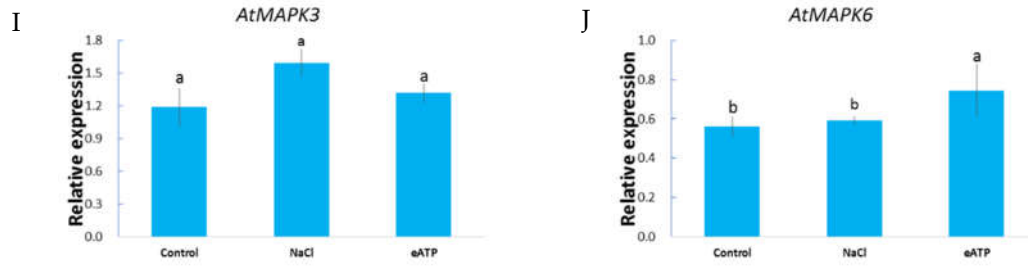

**Figure S2.** Effects of ACC and eATP on some salt-responsive genes transcription of *etr1-1* roots under salt stress. Roots were treated by ATP-Na<sub>2</sub> (300  $\mu$ M) or 100 mM NaCl for 12 h. Quantitative RT-PCR results show the relative transcript abundance of homolog genes in *etr1-1*, such as (A) *AtSOS1* (the PM salt overly sensitive 1/ Na<sup>+</sup>/H<sup>+</sup> antiporter), (B) *AtAHA1* (the PM H<sup>+</sup>-ATPase), (C) *AtEIN3* (the ethylene insensitive 3 gene), (D) *AtEIL1* (the EIN3-like 1 gene), (E) *AtETR1* (the ethylene response 1 gene), (F) *AtRbohF* (the respiratory burst oxidase homolog protein F gene), (G) *AtSOS2* (the salt overly sensitive 2 gene), (H) *AtSOS3* (the salt overly sensitive 3 gene) and (I,J) *AtMAPK3/6* (the mitogen-activated protein kinase 3/6 genes). *AtActin2* served as an internal control for expression normalization. Forward and reverse primers for all tested genes are listed in Table S1. Bars ( $\pm$  SD) represent the means of three to five individual plants; gray lines represent internal controls (value, 1); letters (a and b) indicate significant differences between treatments ( $p < 0.05$ ).
